# Supplementary material for: A naphthalimide-based ‘Pourbaix sensor’: a redox and pH driven AND logic gate with photoinduced electron transfer and internal charge transfer mechanisms
Source: Royal Society of Chemistry journal article supplement (doi:10.1039/c5nj00068h), 2015-01-01
Supplement: c5nj00068h1.pdf [file c5nj00068h1.pdf]

## Supporting Information

### *New Journal of Chemistry*

A naphthalimide-based ‘Pourbaix sensor’: a redox and pH  
driven AND logic gate with photoinduced electron transfer  
and internal charge transfer mechanisms

Jake C. Spiteri, Jonathan S. Schembri and David C. Magri\*

Department of Chemistry, Faculty of Science, University of Malta, Msida, MSD 2080,  
Malta

Corresponding Author:

Dr. David. C. Magri  
email: david.magri@um.edu.mt  
Phone: (+356) 2340 2276  
Fax: (+356) 2340 3320

## Experimental

### Instrumentation

Melting points were recorded on a Stuart Griffin melting point with a Fisherbrand UK thermometer apparatus. The apparatus was calibrated against pure samples of caffeine and vanillin.  $^1\text{H}$  and  $^{13}\text{C}$  NMR spectra were recorded in  $\text{CDCl}_3$  using a Bruker AM 250 NMR spectrometer at 250.1 MHz equipped with a  $^1\text{H}/^{13}\text{C}$  dual probe at room temperature. Samples of approximately 7 mg were dissolved in 0.8 mL of chloroform-*d*. Raw data from the instrumentation were processed on a Bruker Aspect 3000 computer using 16K complex points. Chemical shifts are reported in ppm versus tetramethylsilane at  $\delta = 0.00$  ppm. Infra-red spectra were recorded using a Shimadzu IR-Affinity 1 spectrometer. Prior to use the instrument was calibrated against a  $1602\text{ cm}^{-1}$  polystyrene absorption spectrum. IR analyses were done as either as KBr disks or as a thin film between NaCl plates depending on the sample under investigation. UV-visible absorption spectra were recorded on a Jasco V-650 spectrophotometer interfaced to a desktop computer using a medium response, a bandwidth of 2 nm and a scan speed of  $500\text{ nm min}^{-1}$ . Samples were scanned from 350 to 520 nm. All spectra were corrected for the solvent by scanning the solvent blank prior to the experiments. Fluorimetric studies were performed on a Jasco FP-8300 spectrophotometer in emission mode at an excitation wavelength of 399 nm, a bandwidth of 2.5 nm for both slits and a scan speed of  $500\text{ nm min}^{-1}$ . Samples were scanned from 420 to 670 nm. Electrospray time-of-flight (ES-TOF) spectra were performed on a Waters LC Premier instrument.

### Synthesis

#### Synthesis of **3** – Ferrocenylmethylamine

Ferrocenylmethylamine **3** was prepared according to a two-step literature procedure.<sup>S1</sup> Ferrocenecarboxaldehyde **2** (1.06 g, 4.95 mmol) and hydroxylamine (0.652 g, 19.8 mmol) were dissolved in 30 mL ethanol and refluxed for 4 hours at  $90\text{ }^\circ\text{C}$ . The reaction was monitored using TLC using petroleum ether and diethyl ether (3:7) as eluent. Consequently, the oxime was mixed with 50 mL of water and extracted with

dichloromethane (3×30 mL), dried over anhydrous MgSO<sub>4</sub> and the solvent removed under vacuum to yield the oxime as an orange powder.

Ferrocenylmethylamine was synthesised by reacting LiAlH<sub>4</sub> (0.756 g, 19.9 mmol) with the oxime in 20 mL of anhydrous THF. The reaction was refluxed at 80 °C for 24 hours and monitored by TLC with petroleum ether and diethyl ether (3:7) as the eluent. The organic phase was extracted in diethyl ether (4×30 mL), dried over MgSO<sub>4</sub> and collected by rotary evaporator. The product **3** was purified by flash column chromatography using silica gel and eluted with ethyl acetate and a few drops of triethylamine after removal of other fractions. The amine **3** was collected as the last yellow band. Removal of the solvent by rotatory evaporator gave **3** as an orange oil in 41% yield.

<sup>1</sup>H-NMR (250 MHz, CDCl<sub>3</sub>, SiMe<sub>4</sub>, ppm): δ<sub>H</sub> 1.70 (br s, 2H, NH<sub>2</sub>), 3.55 (s, 2H, CH<sub>2</sub>), 4.15 (m, 9H, Cp); ν<sub>max</sub> (NaCl/cm<sup>-1</sup>): 3366, 3298, 3092, 2965, 2926, 2857, 1636, 1558, 1541, 1456, 1449, 1437, 1105, 1037, 1022, 1001, 817.

#### Synthesis of **4** – *N*-ferrocenyl-4-bromo-1,8-naphthalimide

4-bromo-1,8-naphthalic anhydride (0.440 g, 1.59 mmol) and **3** (0.371 g, 1.73 mmol) were dissolved in 25 mL pyridine. The mixture was stirred and refluxed at 125 °C for 18 hours. The reaction was monitored by TLC using 30:1 CH<sub>2</sub>Cl<sub>2</sub>/acetone. The anhydride and compound **4** gave *R<sub>f</sub>* values of 0.76 and 0.88, respectively. Column chromatography on silica resulted in an orange solid in 34% yield.

Compound **4**: m.p. 230-233 °C (dec.); <sup>1</sup>H-NMR (250 MHz, CDCl<sub>3</sub>, SiMe<sub>4</sub>, ppm): δ<sub>H</sub> 8.65 (d, <sup>1</sup>H, *J* = 7.3 Hz, naphthalimide), 8.52 (d, 1H, *J* = 8.5 Hz, naphthalimide), 8.38 (d, 1H, *J* = 7.9 Hz, naphthalimide), 8.00 (d, 1H, *J* = 7.9 Hz, naphthalimide), 8.65 (t, 1H, *J* = 7.3 Hz, naphthalimide), 5.12 (s, 2H, -CH<sub>2</sub>), 4.50 (t, 2H, *J* = 1.8 Hz, Cp), 4.22 (s, 5H, Cp), 4.09 (t, 2H, *J* = 1.8 Hz, Cp).

Synthesis of **1** – *N*-ferrocenyl-4-methylpiperazine-1,8-naphthalimide

In a 100 mL round-bottomed flask, **4** (209 mg, 0.44 mmol) was dissolved in 20 mL of DMF and 1-methylpiperazine (250 mg, 2.50 mmol).<sup>S2</sup> The reaction mixture was stirred at room temperature under nitrogen for 4 days. Afterwards, 150 mL of water was added to the flask resulting in a yellow precipitate, which was filtered and washed with cold water. Subsequently, the solid was dissolved in hot 3:2 (v/v) EtOH/H<sub>2</sub>O, filtered and concentrated. On cooling in an ice bath, a yellow precipitate was recovered by vacuum filtration, which was washed with cold water and diethyl ether and collected in 72% yield.

Compound **1**: m.p. 170 °C (dec.); <sup>1</sup>H NMR (250 MHz, CDCl<sub>3</sub>, SiMe<sub>4</sub>, ppm): δ<sub>H</sub> 8.56 (d, 1H, *J* = 7.3 Hz, H<sub>j</sub>), 8.49 (d, 1H, *J* = 7.9 Hz, H<sub>i</sub>), 8.37 (d, 1H, *J* = 8.6 Hz, H<sub>e</sub>), 7.65 (t, 1H, *J* = 7.3 Hz, H<sub>h</sub>), 7.19 (d, 1H, *J* = 8.6 Hz, H<sub>f</sub>), 5.11 (s, 2H, -CH<sub>2</sub> spacer), 4.50 (m, 2H, *J* = 1.8 Hz, Cp), 4.20 (s, 5H, Cp), 4.07 (m, 2H, *J* = 1.8 Hz, Cp), 3.28 (m, 4H, upper -CH<sub>2</sub> methylpiperazine), 2.73 (m, 4H, lower -CH<sub>2</sub> methylpiperazine), 2.42 (s, 3H, -NCH<sub>3</sub> methylpiperazine); <sup>13</sup>C-NMR (62.9 MHz, CDCl<sub>3</sub>, SiMe<sub>4</sub>, ppm): δ<sub>C</sub> 39.1, 46.1, 53.0, 55.2, 68.0, 68.6, 70.4, 83.4, 114.9, 116.8, 123.4, 125.6, 126.1, 129.9, 130.2, 131.1, 132.5, 155.9, 163.7, 164.2; ν<sub>max</sub> (NaCl/cm<sup>-1</sup>): 3088, 2929, 2837, 2787, 1691, 1654, 1589, 1577, 1558, 1516, 1452, 1419, 1386, 1373, 1334, 1288, 1244, 1139, 1105, 1006, 977, 785; UV-vis (MeOH) λ<sub>max</sub>/nm (ε/cm<sup>-1</sup> mol L<sup>-1</sup>): 399 (12700); UV-vis (1:1 MeOH/H<sub>2</sub>O) λ<sub>max</sub>/nm (ε/cm<sup>-1</sup> mol L<sup>-1</sup>): 390 (12000); HRMS Calcd. C<sub>28</sub>H<sub>28</sub>N<sub>3</sub>O<sub>2</sub><sup>56</sup>Fe [M+H] 494.1524, found 494.1531.

**References**

- (S1) P. D. Beer and D. K. Smith, *J. Chem. Soc., Dalton Trans.*, 1998, 417.  
(S2) S. Zheng, P. L. M. Lynch, T. E. Rice, T. S. Moody, H. Q. N. Gunaratne, and A. P. de Silva, *Photochem. Photobiol. Sci.*, 2012, **11**, 1675.

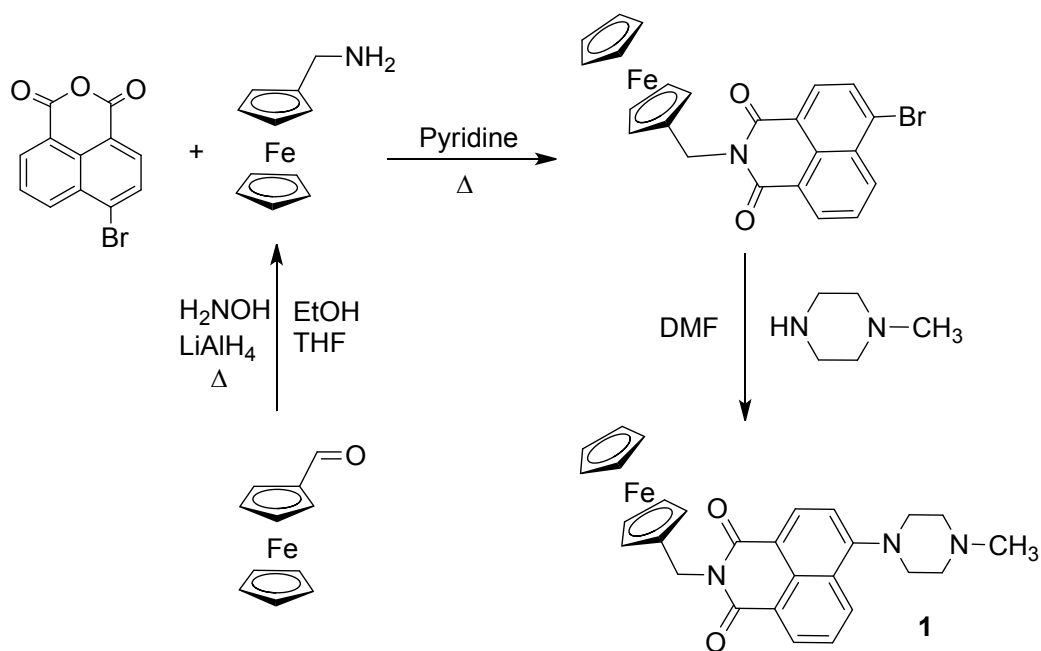

**Scheme S1** The synthesis of the 'Pourbaix sensor' **1**.

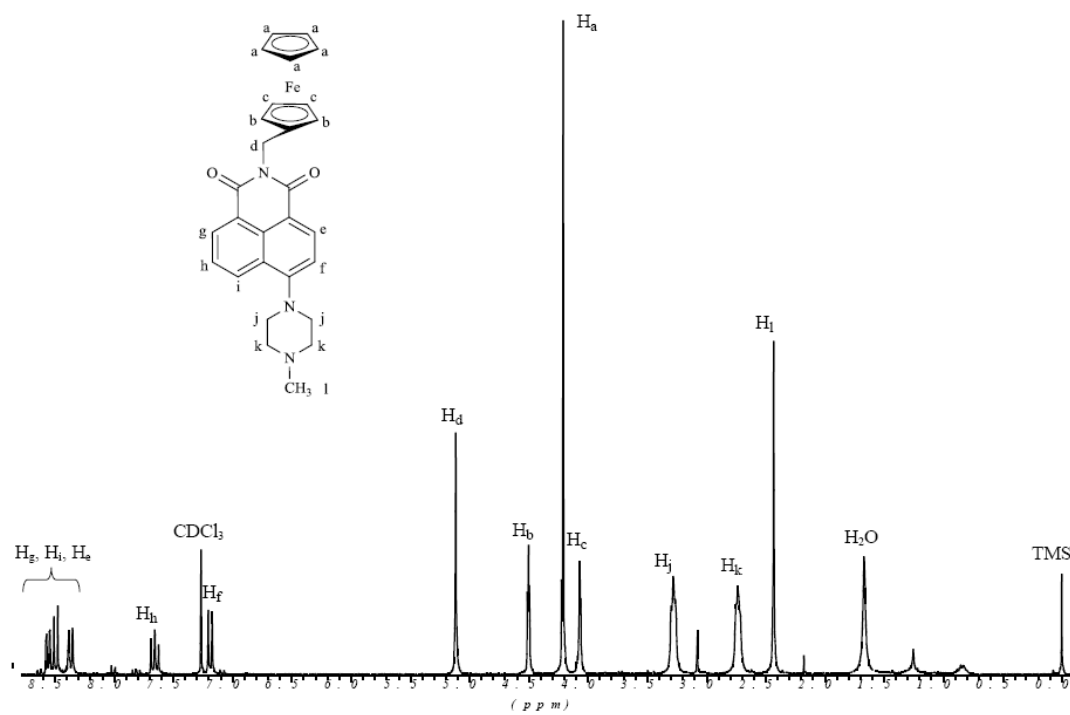

**Fig. S1**  $^1\text{H}$  NMR spectrum of **1** in  $\text{CDCl}_3$ .

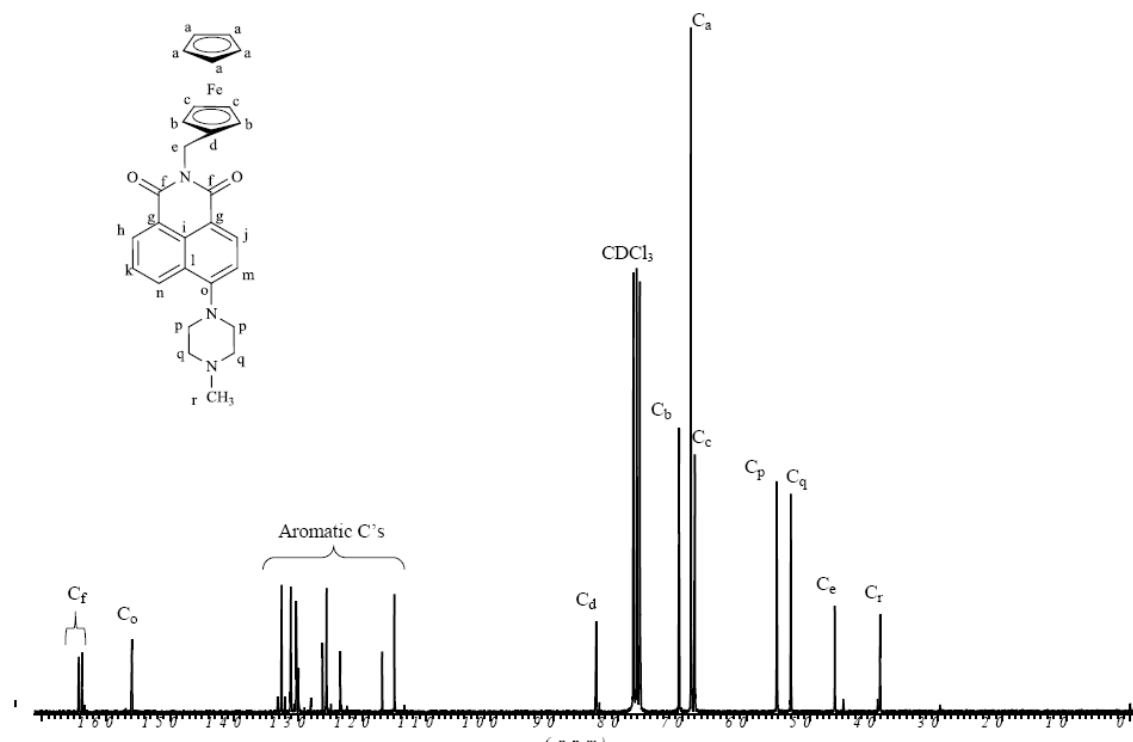

**Fig. S2**  $^{13}\text{C}$  NMR spectrum of **1** in  $\text{CDCl}_3$ .

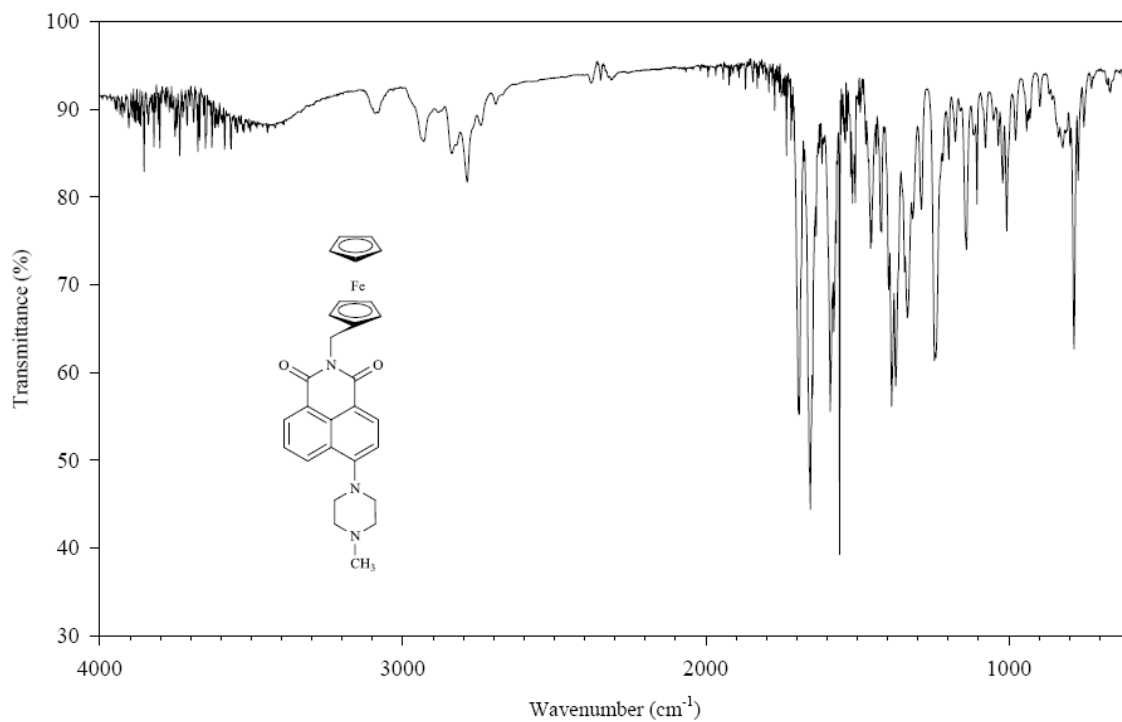

**Fig. S3** Infra-red spectrum of **1** as a KBr disk.

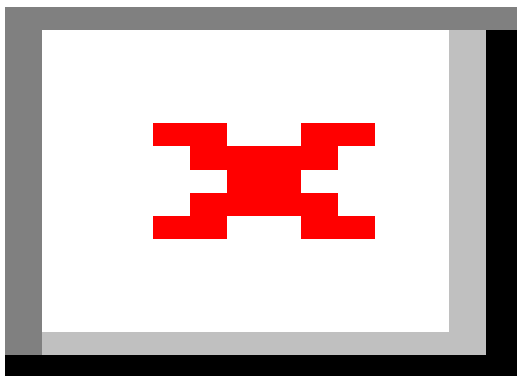

**Fig. S4** UV-visible absorption spectra of  $10^{-5}$  M **1** in MeOH in the absence and presence of 25 mM methanesulfonic acid.

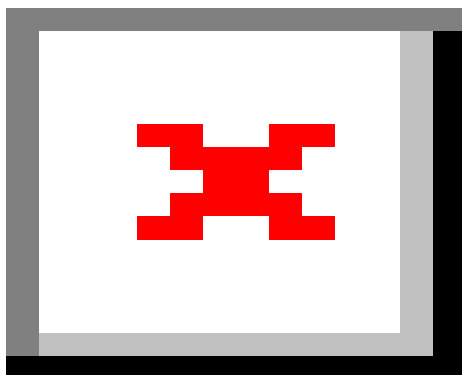

**Fig. S5** UV-visible absorption spectra of  $10^{-5}$  M **1** in 1:1 (v/v) MeOH:H<sub>2</sub>O with increasing concentration of methanesulfonic acid up to 25 mM.

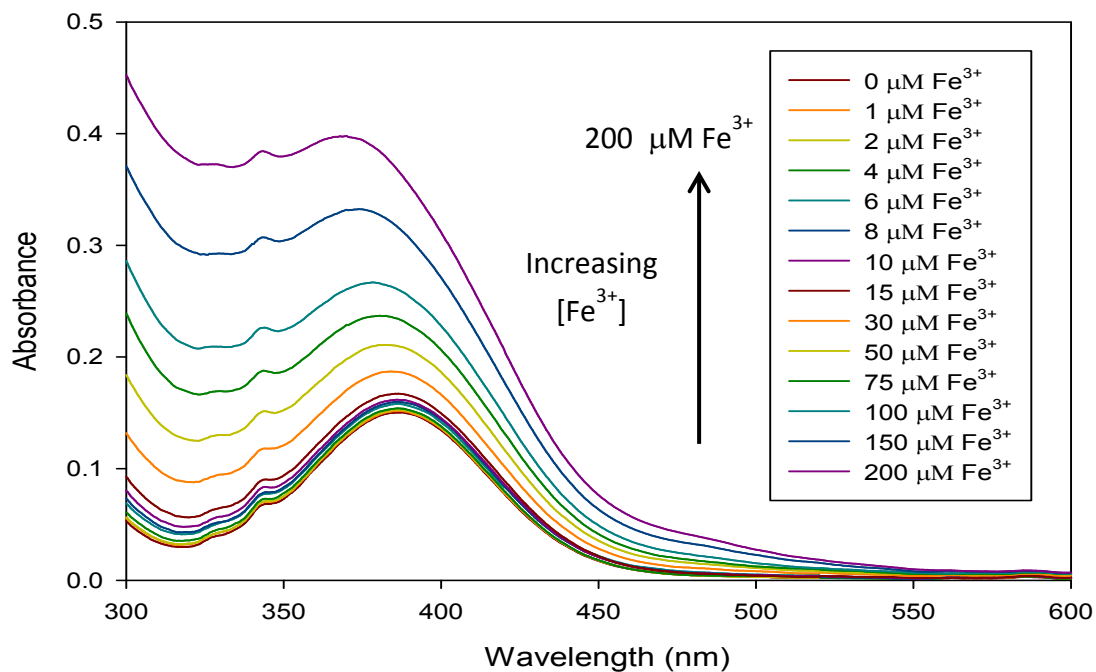

**Fig. S6** UV-visible absorption spectra of  $10^{-5}$  M **1** in 1:1 (v/v) MeOH:H<sub>2</sub>O at pH 3.6 on increasing concentration of iron(III) sulfate pentahydrate.

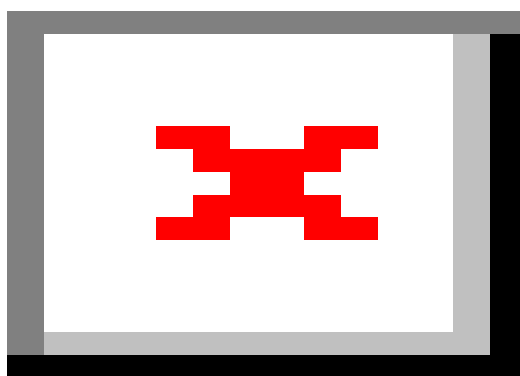

**Fig. S7** Fluorescence spectra of **1** in 1:1 (v/v) MeOH:H<sub>2</sub>O with methanesulfonic acid as titrant in presence of 20 μM Fe(III).



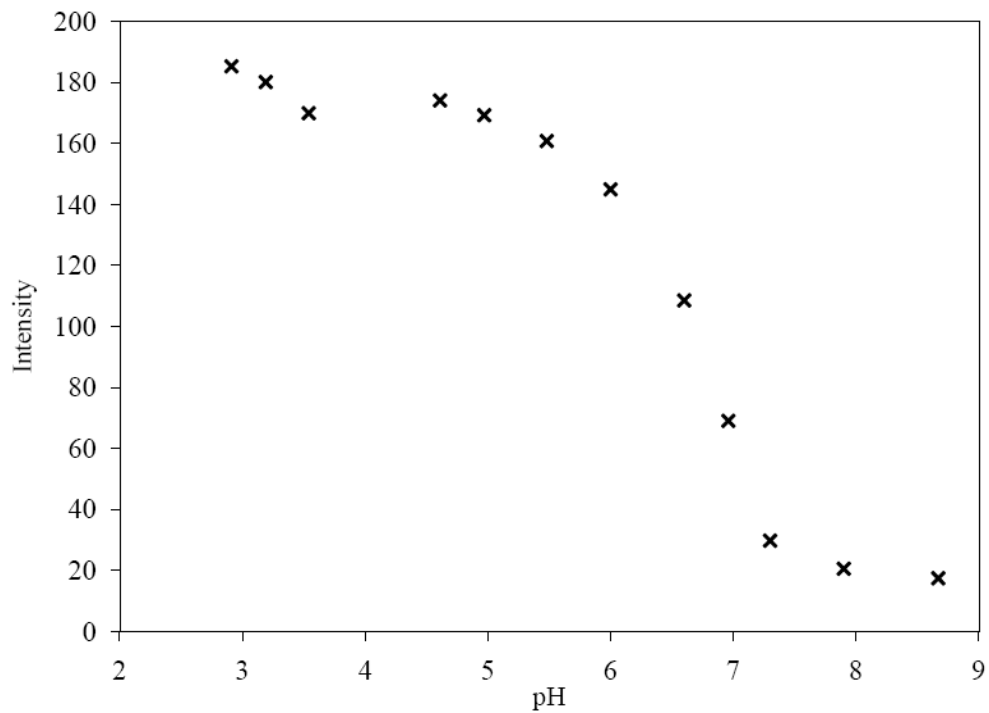

**Fig. S8** Titration curve plotted at the maximum intensity of 525 nm against the pH in presence of 20  $\mu\text{M}$  Fe(III) in 1:1 (v/v) MeOH:H<sub>2</sub>O.

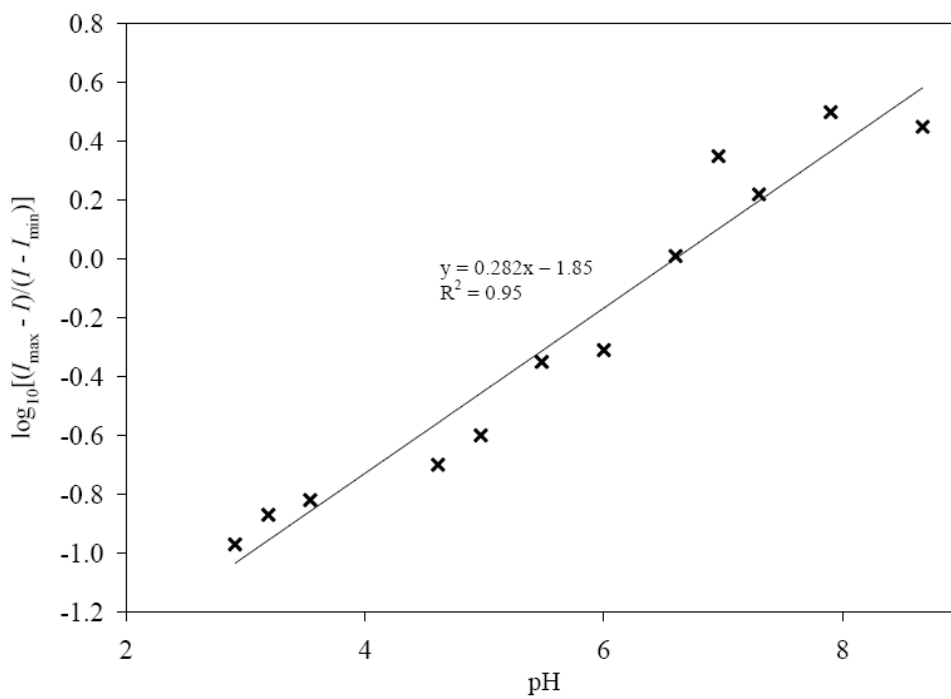

**Fig. S9** Graph of  $\log[(I_{\max} - I)/(I - I_{\min})]$  at 525 nm against pH in presence of 20  $\mu\text{M}$  Fe(III) in 1:1 (v/v) MeOH:H<sub>2</sub>O.

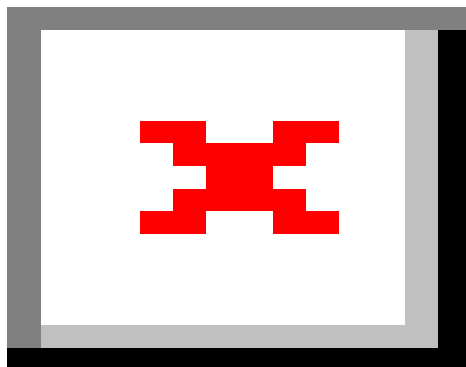

**Fig. S10** Fluorescence spectra of **1** in 1:1 (v/v) MeOH:H<sub>2</sub>O using Fe(III) as titrant in the presence of 0.20 mM methanesulfonic acid .

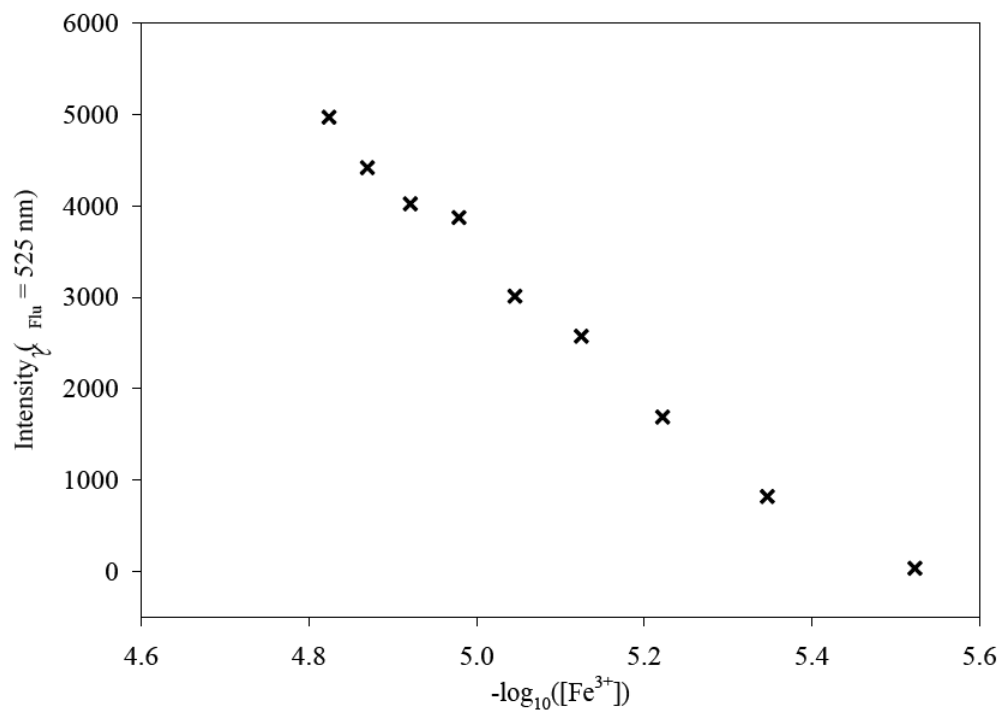

**Fig. S11** Fluorescence titration curve plotted at 525 nm against the  $-\log [\text{Fe}^{3+}]$  in the presence of 0.20 mM methanesulfonic acid in 1:1 (v/v) MeOH:H<sub>2</sub>O.

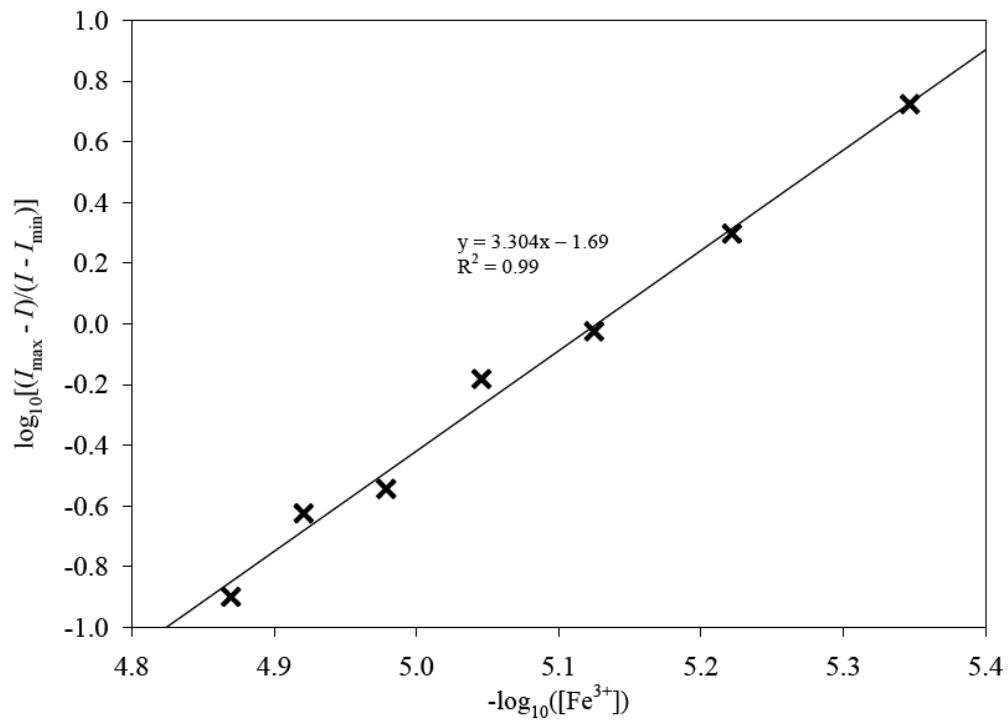

**Fig. S12** Plot of  $\log[(I_{\max} - I)/(I - I_{\min})]$  at 525 nm against the  $-\log [\text{Fe}^{3+}]$  in the presence of 0.20 mM methanesulfonic acid in 1:1 (v/v) MeOH:H<sub>2</sub>O.
